# Supplementary material
Source: MDPI journal article supplement (https://www.mdpi.com/2072-4292/13/5/1034)
Supplement: s1 [file s1]

**Dynamics of *Vibrio cholerae* in a typical tropical lake and estuarine system: potential of remote sensing for risk mapping**

Abdulaziz Anas<sup>1,\*</sup>, Kiran Krishna<sup>1</sup>, Syamkumar V<sup>1</sup>, Grinson George<sup>2</sup>, Nandini Menon<sup>3</sup>, Gemma Kulk<sup>4</sup>, Jasmin C<sup>1</sup>, Angelo Ciambelli<sup>4</sup>, Hridya KV<sup>1</sup>, Balu Tharakan<sup>1</sup>, Abdul Jaleel KU<sup>1</sup>, Elizabeth Goult<sup>4</sup>, Jithin V<sup>1</sup>, Trevor Platt<sup>4</sup>, Shubha Sathyendranath<sup>4,5\*</sup>

**Supplementary data**

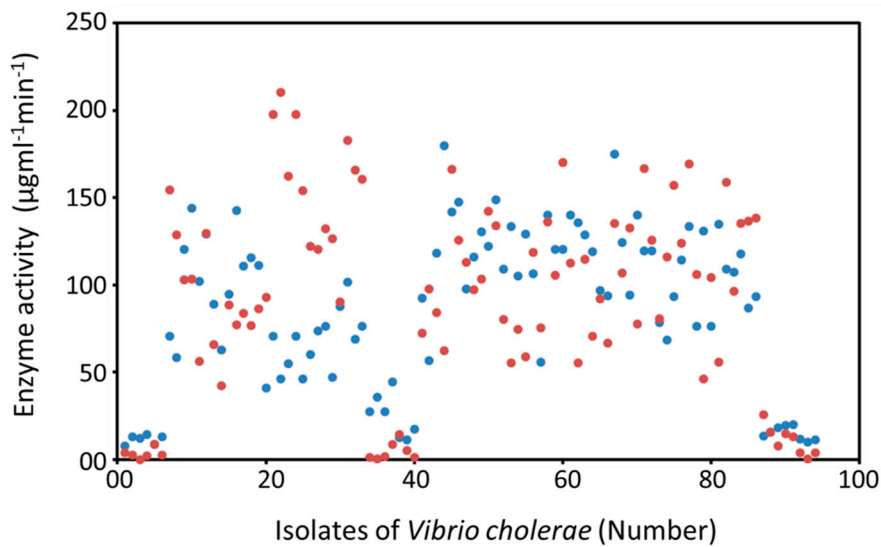

**Supplementary figure 1.** *In vitro* testing of laminarinase (red) and chitinase (blue) activities of environmental *Vibrio cholerae* (96 isolates) isolated from the coastal waters

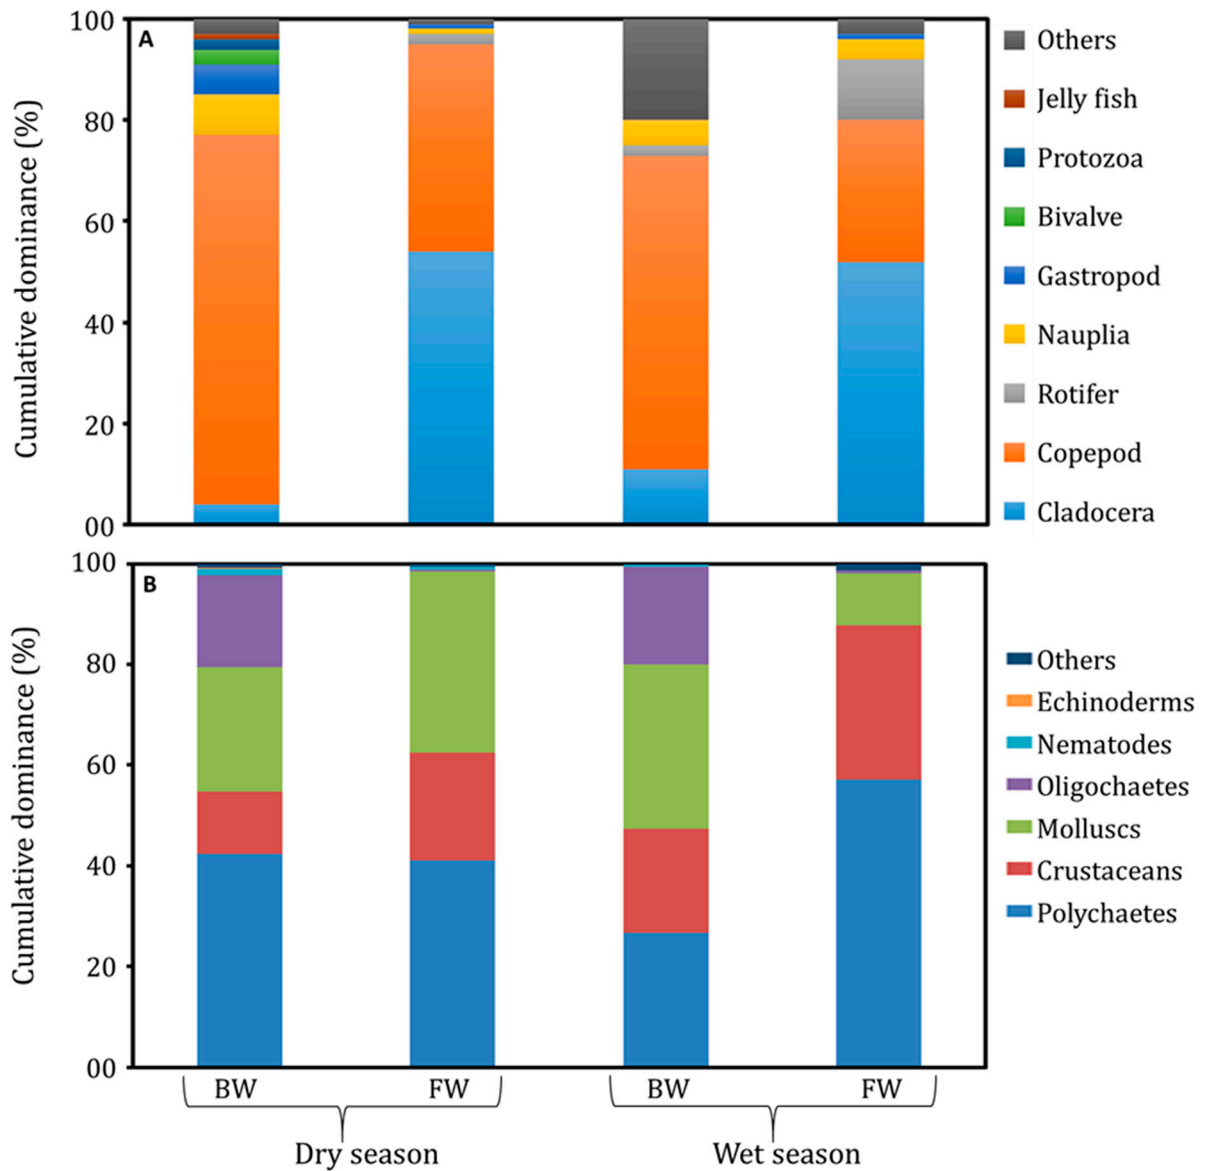

**Supplementary figure 2:** Dominant groups of (A) zooplankton and (B) benthic organisms in the brackish water (BW) and freshwater (FW) regions of the Vembanad Lake during dry and wet seasons.
